# Supplementary material
Source: Springer Nature journal article supplement (https://www.springermedizin.de/resource/supplementary/12245_2011_100_MOESM4_ESM.pdf/9672772)
Supplement: MOESM4 [file 9672772]

LightSpeed VCT cted  
Ex:11147  
IM: 67 SE: 4  
CTA DOMES TO BELOW TOES  
Contrast: IV  
XY: -149.50  
DFOV: 455mm STANDARD

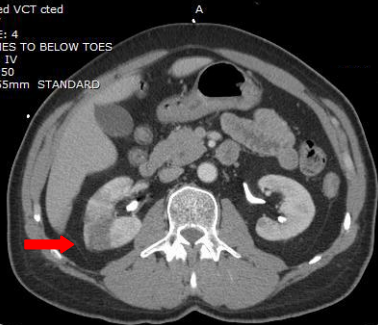

KV: 120  
mA: 687  
2.500000mm/39.375000 0.984:1  
Tilt: 0  
0.600000s/HE 12:49:44 PM  
W: 450 C: 50 Z: 1

CTA ABD AORTA/ILIOFEM RUNOFF

Page: 67 of 589

LightSpeed VCT cted  
Ex:11147  
IM: 51 SE: 4  
CTA DOMES TO BELOW TOES  
Contrast: IV  
XY: -109.50  
DFOV: 455mm STANDARD

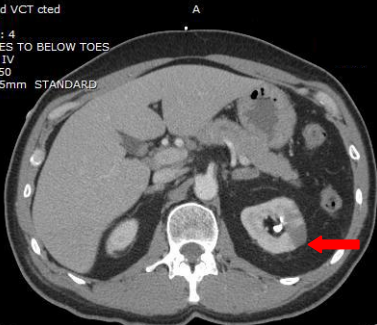

KV: 120  
mA: 711  
2.500000mm/39.375000 0.984:1  
Tilt: 0  
0.600000s/HE 12:49:44 PM  
W: 450 C: 50 Z: 1

CTA ABD AORTA/ILIOFEM RUNOFF

Page: 51 of 589

LightSpeed VCT cted  
Ex:11147  
IM: 32 SE: 4  
CTA DOMES TO BELOW TOES  
Contrast: IV  
XY: -62  
DFOV: 455mm STANDARD

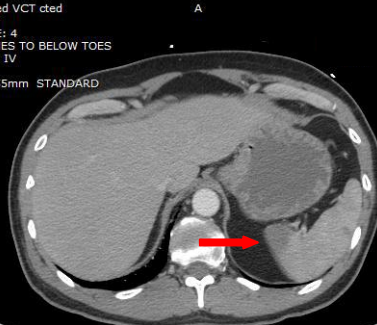

KV: 120  
mA: 696  
2.500000mm/39.375000 0.984:1  
Tilt: 0  
0.600000s/HE 12:49:44 PM  
W: 450 C: 50 Z: 1

CTA ABD AORTA/ILIOFEM RUNOFF

Page: 32 of 589
